# Supplementary material for: Effectiveness of Prophylactic Surgeries in BRCA1 or BRCA2 Mutation Carriers: A Meta-analysis and Systematic Review
Source: Oxford University Press journal article supplement (doi:10.1158/1078-0432.ccr-15-1465), 2016-03-15
Supplement: 10780432ccr151465-sup-151611_2_table_3337073_71w77w.doc [file 10780432ccr151465-sup-151611_2_table_3337073_71w77w.doc]

**Table A1. PBSO and BC risk in BRCA1/2 mutation carriers**

| **First author** | **year** | **Study design** | **BC by mutation status, RR (95% CI)** | | |
| --- | --- | --- | --- | --- | --- |
| **BRCA1/2** | **BRCA1** | **BRCA2** |
| Eisen A | 2005 | CC | OR 0.46 (0.32-0.65) | OR 0.44 (0.29-0.66) | OR 0.57 (0.28-1.15) |
| Kramer JL | 2005 | PC | NA | HR 0.38 (0.15-0.97) | NA |
| Chang-Claude J | 2007 | RC | HR 0.56 (0.29-1.09) | HR 0.50 (0.24-1.04) | HR 0.40 (0.07-2.44) |
| Kauff ND | 2008 | PC | NA | HR 0.61 (0.30-1.22) | HR 0.28 (0.08-0.92) |
| Finkelman BS | 2012 | PC | HR 0.62 (0.47-0.83) | NA | NA |
| **Summary RRs for all studies** | |  | **RR 0.552 (0.448-0.682)** | **RR 0.47 (0.348-0.636)** | **RR 0.468 (0.263-0.835)** |

PBSO, prophylactic bilateral salpingo-oophorectomy; BC, breast cancer; CC, case-control study; PC, prospective cohort study; RC, retrospective cohort study;

NA, not applicable
