# Supplementary material for: Effectiveness of Prophylactic Surgeries in BRCA1 or BRCA2 Mutation Carriers: A Meta-analysis and Systematic Review
Source: Oxford University Press journal article supplement (doi:10.1158/1078-0432.ccr-15-1465), 2016-03-15
Supplement: 10780432ccr151465-sup-151611_2_table_3337074_m1wmvt.doc [file 10780432ccr151465-sup-151611_2_table_3337074_m1wmvt.doc]

**Table A2.BPM and BC risk in BRCA1/2 mutation carriers**

| **First author** | **year** | **Study design** | **BRCA1/2**  **BC/no BC (n)** | | **BRCA1**  **BC/no BC (n)** | | **BRCA2**  **BC/no BC (n)** | |
| --- | --- | --- | --- | --- | --- | --- | --- | --- |
| **BPM group** | **Con group** | **BPM group** | **Con group** | **BPM group** | **Con group** |
| Meijers-Heijboer H | 2001 | PC | 0/76 | 8/55 | NA | NA | NA | NA |
| Rebbeck TR | 2004 | PC | 2/57 | 149/156 | NA | NA | NA | NA |
| Domchek SM | 2010 | PC | 0/75 | 34/551 | 0/43 | 19/353 | 0/32 | 15/198 |
| Skytte AB | 2011 | PC | 3/93 | 16/195 | 3/64 | 12/122 | 0/29 | 4/73 |
| Heemskerk-Gerritsen BA | 2013 | PC | 0/212 | 57/301 | 0/156 | 49/200 | 0/56 | 8/101 |
| Ingham SL | 2013 | PC | 4/54 | 202/255 | 1/28 | 94/125 | 3/26 | 108/130 |
| **Summary RRs for all studies** | |  | **RR 0.114 (0.041-0.317)** | | **RR 0.134 (0.019-0.937)** | | **RR 0.183 (0.072-0.468)** | |

BPM, bilateral prophylactic mastectomy; BC, breast cancer; PC, prospective cohort study; Con, control; NA, not applicable
