# Supplementary material for: Effectiveness of Prophylactic Surgeries in BRCA1 or BRCA2 Mutation Carriers: A Meta-analysis and Systematic Review
Source: Oxford University Press journal article supplement (doi:10.1158/1078-0432.ccr-15-1465), 2016-03-15
Supplement: 10780432ccr151465-sup-151611_2_table_3337078_b1wbx3.doc [file 10780432ccr151465-sup-151611_2_table_3337078_b1wbx3.doc]

**Table A3.** **CPM and CBC risk in BRCA1/2 mutation carriers**

| **First author** | **year** | **Study design** | **BRCA1/2**  **BC/no BC (n)** | |
| --- | --- | --- | --- | --- |
| **CPM group** | **Con group** |
| van Sprundel TC | 2005 | PC | 1/78 | 32/37 |
| Evans DG | 2013 | PC | 1/42 | 83/390 |
| Metcalfe K | 2014 | RC | 1/180 | 70/139 |
| A M Heemskerk-Gerritsen B | 2014 | PC | 4/238 | 64/312 |
| **Summary RRs for all studies** | |  | **RR 0.073 (0.035-0.148)** | |

CPM, contralateral prophylactic mastectomy; BC, breast cancer; PC, prospective cohort study;

RC, retrospective cohort study; Con, control; NA, not applicable
